# Supplementary material for: Unique DUOX2+ACE2+ small cholangiocytes are pathogenic targets for primary biliary cholangitis
Source: PubMed Central journal article supplement (PMC9911648; doi:10.1038/s41467-022-34606-w), 2023-02-09
Supplement: 41467_2022_34606_MOESM2_ESM.pdf [file 41467_2022_34606_MOESM2_ESM.pdf]

## Description of Additional Supplementary Files

File name: Supplementary Data 1

Description: Differentially expressed genes of the clusters identified from 70,050 liver cells

File name: Supplementary Data 2

Description: Differentially expressed genes of the cell lineages identified from 70,050 liver cells

File name: Supplementary Data 3

Description: Differentially expressed genes of the clusters identified from 2,209 cholangiocytes

File name: Supplementary Data 4

Description: Differentially expressed genes of the clusters identified from 25,549 liver T cells and natural killer cells

File name: Supplementary Data 5

Description: Differentially expressed genes of the clusters identified from 2,783 liver B cells and plasma cells

File name: Supplementary Data 6

Description: Differentially expressed genes of the clusters identified from 4,873 liver mononuclear phagocytes and dendritic cells

File name: Supplementary Data 7

Description: Differentially expressed genes of the clusters identified from 2,664 liver endothelial cells

File name: Supplementary Data 8

Description: Differentially expressed genes of the clusters identified from 1,136 liver mesenchymal cells
