# Supplementary material for: Unique DUOX2+ACE2+ small cholangiocytes are pathogenic targets for primary biliary cholangitis
Source: PubMed Central journal article supplement (PMC9911648; doi:10.1038/s41467-022-34606-w), 2023-02-09
Supplement: 41467_2022_34606_MOESM11_ESM.pdf [file 41467_2022_34606_MOESM11_ESM.pdf]

## Reporting Summary

Nature Portfolio wishes to improve the reproducibility of the work that we publish. This form provides structure for consistency and transparency in reporting. For further information on Nature Portfolio policies, see our [Editorial Policies](#) and the [Editorial Policy Checklist](#).

### Statistics

For all statistical analyses, confirm that the following items are present in the figure legend, table legend, main text, or Methods section.

n/a Confirmed

- |                                     |                                     |                                                                                                                                                                                                                                                            |
|-------------------------------------|-------------------------------------|------------------------------------------------------------------------------------------------------------------------------------------------------------------------------------------------------------------------------------------------------------|
| <input checked="" type="checkbox"/> | <input checked="" type="checkbox"/> | The exact sample size ( $n$ ) for each experimental group/condition, given as a discrete number and unit of measurement                                                                                                                                    |
| <input checked="" type="checkbox"/> | <input checked="" type="checkbox"/> | A statement on whether measurements were taken from distinct samples or whether the same sample was measured repeatedly                                                                                                                                    |
| <input checked="" type="checkbox"/> | <input checked="" type="checkbox"/> | The statistical test(s) used AND whether they are one- or two-sided<br><i>Only common tests should be described solely by name; describe more complex techniques in the Methods section.</i>                                                               |
| <input checked="" type="checkbox"/> | <input type="checkbox"/>            | A description of all covariates tested                                                                                                                                                                                                                     |
| <input checked="" type="checkbox"/> | <input type="checkbox"/>            | A description of any assumptions or corrections, such as tests of normality and adjustment for multiple comparisons                                                                                                                                        |
| <input type="checkbox"/>            | <input checked="" type="checkbox"/> | A full description of the statistical parameters including central tendency (e.g. means) or other basic estimates (e.g. regression coefficient) AND variation (e.g. standard deviation) or associated estimates of uncertainty (e.g. confidence intervals) |
| <input type="checkbox"/>            | <input checked="" type="checkbox"/> | For null hypothesis testing, the test statistic (e.g. $F$ , $t$ , $r$ ) with confidence intervals, effect sizes, degrees of freedom and $P$ value noted<br><i>Give <math>P</math> values as exact values whenever suitable.</i>                            |
| <input checked="" type="checkbox"/> | <input type="checkbox"/>            | For Bayesian analysis, information on the choice of priors and Markov chain Monte Carlo settings                                                                                                                                                           |
| <input checked="" type="checkbox"/> | <input type="checkbox"/>            | For hierarchical and complex designs, identification of the appropriate level for tests and full reporting of outcomes                                                                                                                                     |
| <input checked="" type="checkbox"/> | <input type="checkbox"/>            | Estimates of effect sizes (e.g. Cohen's $d$ , Pearson's $r$ ), indicating how they were calculated                                                                                                                                                         |

*Our web collection on [statistics for biologists](#) contains articles on many of the points above.*

### Software and code

Policy information about [availability of computer code](#)

|                 |                                                                                                                                                                                                                                                                                                                                                                                                                                                                                                                                                                                                                |
|-----------------|----------------------------------------------------------------------------------------------------------------------------------------------------------------------------------------------------------------------------------------------------------------------------------------------------------------------------------------------------------------------------------------------------------------------------------------------------------------------------------------------------------------------------------------------------------------------------------------------------------------|
| Data collection | No software was used to collect data.                                                                                                                                                                                                                                                                                                                                                                                                                                                                                                                                                                          |
| Data analysis   | Software used for the analyses are: FastQC (version 0.11.4); Fastp (version 1); Cutadapt (version 1.17); STAR (version 2.5.3a); FeatureCounts (version 1.6.2); Seurat (version 3.1.2); Harmony (version 1.0); ClusterProfiler (version 4.4.4); R (version 3.6.3); Cell Ranger (version 3.1.0); CellPhoneDB (version 2.1.0); Circlize (version 0.4.15); StLearn (version 0.3.1); FlowJo (version 10.6.2); ZEN (version 2012); Spectronaut (version 14.4.200727.47784); Cluster 3.0 (version 3.0); Java Treeview (version 3.0); InterProScan (version 5.25-64.0); SPSS (version 23); GraphPad Prism (version 8). |

For manuscripts utilizing custom algorithms or software that are central to the research but not yet described in published literature, software must be made available to editors and reviewers. We strongly encourage code deposition in a community repository (e.g. GitHub). See the Nature Portfolio [guidelines for submitting code & software](#) for further information.

### Data

Policy information about [availability of data](#)

All manuscripts must include a [data availability statement](#). This statement should provide the following information, where applicable:

- Accession codes, unique identifiers, or web links for publicly available datasets
- A description of any restrictions on data availability
- For clinical datasets or third party data, please ensure that the statement adheres to our [policy](#)

The raw data of scRNA-seq, BCR and TCR sequencing, and spatial transcriptomics generated in this study have been deposited in the Genome Sequence Archive (GSA) under accession code HRA002347 (<https://ngdc.cncb.ac.cn/gsa-human/browse/HRA002347>). The processed data of scRNA-seq and spatial transcriptomics generated in this study have been deposited in the Open Archive for Miscellaneous (OMIX) under accession code OMIX001122 (<https://ngdc.cncb.ac.cn/omix/>)

release/OMIX001122). The proteomics data generated in this study have been deposited in the OMIX under accession code OMIX001127 (<https://ngdc.cncb.ac.cn/omix/release/OMIX001127>). All the above data belong to a same project in the National Genomics Data Center, China National Center for Bioinformatics (CNCB-NGDC) under accession code of PRJCA009122 (<https://ngdc.cncb.ac.cn/bioproject/browse/PRJCA009122>). Source data are provided with this paper.

## Field-specific reporting

Please select the one below that is the best fit for your research. If you are not sure, read the appropriate sections before making your selection.

Life sciences  Behavioural & social sciences  Ecological, evolutionary & environmental sciences

For a reference copy of the document with all sections, see [nature.com/documents/nr-reporting-summary-flat.pdf](https://www.nature.com/documents/nr-reporting-summary-flat.pdf)

## Life sciences study design

All studies must disclose on these points even when the disclosure is negative.

|                 |                                                                                                                                                                                                                                                                                                                                                                                                                                                                                                                                                                                                                                                                                                                                                           |
|-----------------|-----------------------------------------------------------------------------------------------------------------------------------------------------------------------------------------------------------------------------------------------------------------------------------------------------------------------------------------------------------------------------------------------------------------------------------------------------------------------------------------------------------------------------------------------------------------------------------------------------------------------------------------------------------------------------------------------------------------------------------------------------------|
| Sample size     | No statistical method was used to estimate sample size. For scRNA-seq, the sample size was based on published high quality scRNA-seq studies (see Referees: Ramachandran P, et al., Nature, 2019, 575, 512-518; Corridoni D, et al., Nat Med, 2020, 26, 1480-1490; MacParland SA, et al. Nat Commun, 2018, 9, 4383; Zhang M, et al. J Hepatol, 2020, 73, 1118-1130). According to the studies, we chosen 5 PBC samples and 4 control samples to perform scRNA-seq, which allowed us to perform statistical analysis on the obtained data. Other experiments were generally conducted with at least n = 3 biologically independent samples to guarantee reproducibility of the results. Sample size for each experiment is indicated in the figure legend. |
| Data exclusions | No data were excluded from analyses.                                                                                                                                                                                                                                                                                                                                                                                                                                                                                                                                                                                                                                                                                                                      |
| Replication     | Experiments were conducted at least 3 times. Exact n-values are given in the figure legends.                                                                                                                                                                                                                                                                                                                                                                                                                                                                                                                                                                                                                                                              |
| Randomization   | No randomization was used in the study due to patient data is observational.                                                                                                                                                                                                                                                                                                                                                                                                                                                                                                                                                                                                                                                                              |
| Blinding        | For all photomicrographs, the authors who did the experiments were blinded to group allocation during data collection and analysis                                                                                                                                                                                                                                                                                                                                                                                                                                                                                                                                                                                                                        |

## Reporting for specific materials, systems and methods

We require information from authors about some types of materials, experimental systems and methods used in many studies. Here, indicate whether each material, system or method listed is relevant to your study. If you are not sure if a list item applies to your research, read the appropriate section before selecting a response.

### Materials & experimental systems

| n/a                                 | Involvement in the study                                        |
|-------------------------------------|-----------------------------------------------------------------|
| <input type="checkbox"/>            | <input checked="" type="checkbox"/> Antibodies                  |
| <input checked="" type="checkbox"/> | <input type="checkbox"/> Eukaryotic cell lines                  |
| <input checked="" type="checkbox"/> | <input type="checkbox"/> Palaeontology and archaeology          |
| <input type="checkbox"/>            | <input checked="" type="checkbox"/> Animals and other organisms |
| <input type="checkbox"/>            | <input checked="" type="checkbox"/> Human research participants |
| <input checked="" type="checkbox"/> | <input type="checkbox"/> Clinical data                          |
| <input checked="" type="checkbox"/> | <input type="checkbox"/> Dual use research of concern           |

### Methods

| n/a                                 | Involvement in the study                           |
|-------------------------------------|----------------------------------------------------|
| <input checked="" type="checkbox"/> | <input type="checkbox"/> ChIP-seq                  |
| <input type="checkbox"/>            | <input checked="" type="checkbox"/> Flow cytometry |
| <input checked="" type="checkbox"/> | <input type="checkbox"/> MRI-based neuroimaging    |

## Antibodies

Antibodies used

All antibodies used in the study are listed in the Supplementary Table 14.

Antibodies for mouse immunofluorescence:

|            |                          |            |
|------------|--------------------------|------------|
| Ace2       | Abcam, Cambridge, MA     | ab108252   |
| Duox2      | Abcam, Cambridge, MA     | ab97266    |
| Ck19       | Abcam, Cambridge, MA     | ab52625    |
| pIgR       | Proteintech, Chicago, IL | 22024-1-AP |
| Ck7        | Abcam, Cambridge, MA     | ab181598   |
| Rabbit IgG | Proteintech, Chicago, IL | B900610    |
| Mouse IgG  | Proteintech, Chicago, IL | B900620    |

Antibodies for human immunofluorescence:

|      |                       |         |
|------|-----------------------|---------|
| CD20 | ZSGB-BIO, Beijing, BJ | ZA-0549 |
|------|-----------------------|---------|

|                                                           |                                    |            |             |
|-----------------------------------------------------------|------------------------------------|------------|-------------|
| CD27                                                      | Proteintech, Chicago, IL           | 66308-1-Ig |             |
| IgD                                                       | ZSGB-BIO, Beijing, BJ              | ZA-0443    |             |
| CD138                                                     | ZSGB-BIO, Beijing, BJ              | ZA-0584    |             |
| ACE2                                                      | Proteintech, Chicago, IL           | 66699-1-Ig |             |
| DUOX2                                                     | Abcam, Cambridge, MA               | ab97266    |             |
| CK19                                                      | Abcam, Cambridge, MA               | ab52625    |             |
| plgR                                                      | Proteintech, Chicago, IL           | 22024-1-AP |             |
| CK7                                                       | Abcam, Cambridge, MA               | ab181598   |             |
| Rabbit IgG                                                | Proteintech, Chicago, IL           | B900610    |             |
| Mouse IgG                                                 | Proteintech, Chicago, IL           | B900620    |             |
| Antibodies for mouse fluorescence activated cell sorting: |                                    |            |             |
| Duox2                                                     | Santa cruz, Dallas, TX             |            | sc-398681   |
| Ck19 Alexa Fluor® 647                                     | Abcam, Cambridge, MA               |            | ab192980    |
| Ace2 CoraLite®488 Fluorescent Dye                         | Proteintech, Chicago, IL           |            | CL488-66699 |
| IgG2a heavy chain PE/Cy7®                                 | Abcam, Cambridge, MA               |            | ab130787    |
| Isotype control to Duox2 PE/Cy7                           | BD Biosciences, Franklin Lakes, NJ |            | 557872      |
| Isotype control to Ck19 Alexa Fluor® 647                  | Abcam, Cambridge, MA               |            | ab199093    |
| Isotype control to Ace2 CoraLite®488                      | Proteintech, Chicago, IL           |            | CL488-65124 |
| Antibodies for human fluorescence activated cell sorting: |                                    |            |             |
| DUOX2                                                     | Santa cruz, Dallas, TX             |            | sc-398681   |
| CK19 Alexa Fluor® 647                                     | Abcam, Cambridge, MA               |            | ab192980    |
| ACE2 CoraLite®488 Fluorescent Dye                         | Proteintech, Chicago, IL           |            | CL488-66699 |
| IgG2a heavy chain PE/Cy7®                                 | Abcam, Cambridge, MA               |            | ab130787    |
| Isotype control to DUOX2 PE/Cy7                           | BD Biosciences, Franklin Lakes, NJ |            | 557872      |
| Isotype control to CK19 Alexa Fluor® 647                  | Abcam, Cambridge, MA               |            | ab199093    |
| Isotype control to ACE2 CoraLite®488                      | Proteintech, Chicago, IL           |            | CL488-65124 |
| Antibody for human immunohistochemistry:                  |                                    |            |             |
| CK7                                                       | Abcam, Cambridge, MA               |            | ab181598    |

## Validation

|                                                                                                                                                                                                                                                                  |
|------------------------------------------------------------------------------------------------------------------------------------------------------------------------------------------------------------------------------------------------------------------|
| All antibodies used in the study are commercially available with validation procedures described on the sites of the manufacture or relevant citation.                                                                                                           |
| Ace2 for IF: <a href="https://www.abcam.cn/ace2-antibody-epr44352-ab108252.html">https://www.abcam.cn/ace2-antibody-epr44352-ab108252.html</a>                                                                                                                   |
| Duox2 for IF: <a href="https://www.abcam.cn/duox2-antibody-ab97266.html">https://www.abcam.cn/duox2-antibody-ab97266.html</a>                                                                                                                                    |
| Ck19 for IF: <a href="https://www.abcam.cn/cytokeratin-19-antibody-ep1580y-cytoskeleton-marker-ab52625.html">https://www.abcam.cn/cytokeratin-19-antibody-ep1580y-cytoskeleton-marker-ab52625.html</a>                                                           |
| plgR for IF: <a href="https://www.ptgcn.com/products/PIGR-Antibody-22024-1-AP.htm">https://www.ptgcn.com/products/PIGR-Antibody-22024-1-AP.htm</a>                                                                                                               |
| Ck7/CK7 for IF and IHC: <a href="https://www.abcam.cn/cytokeratin-7-antibody-epr17078-cytoskeleton-marker-ab181598.html">https://www.abcam.cn/cytokeratin-7-antibody-epr17078-cytoskeleton-marker-ab181598.html</a>                                              |
| Rabbit IgG for IF: <a href="https://www.ptgcn.com/products/Rabbit-IgG-B900610.htm">https://www.ptgcn.com/products/Rabbit-IgG-B900610.htm</a>                                                                                                                     |
| Mouse IgG for IF: <a href="https://www.ptgcn.com/products/Mouse-IgG-B900620.htm">https://www.ptgcn.com/products/Mouse-IgG-B900620.htm</a>                                                                                                                        |
| CD20 for IF: <a href="https://www.sciencedirect.com/science/article/pii/S1198743X18302982">https://www.sciencedirect.com/science/article/pii/S1198743X18302982</a>                                                                                               |
| CD27 for IF: <a href="https://www.ptgcn.com/products/CD27-Antibody-66308-1-Ig.htm">https://www.ptgcn.com/products/CD27-Antibody-66308-1-Ig.htm</a>                                                                                                               |
| IgD for IF: <a href="http://www.zsbio.com/product/ZA-0443">http://www.zsbio.com/product/ZA-0443</a>                                                                                                                                                              |
| CD138 for IF: <a href="http://www.zsbio.com/product/ZA-0584">http://www.zsbio.com/product/ZA-0584</a>                                                                                                                                                            |
| ACE2 for IF: <a href="https://www.ptgcn.com/products/ACE2-Antibody-66699-1-Ig.htm">https://www.ptgcn.com/products/ACE2-Antibody-66699-1-Ig.htm</a>                                                                                                               |
| DUOX2 for IF: <a href="https://www.scbt.com/p/duox2-antibody-e-8?requestFrom=search">https://www.scbt.com/p/duox2-antibody-e-8?requestFrom=search</a>                                                                                                            |
| CK19 for IF: <a href="https://www.abcam.cn/cytokeratin-19-antibody-ep1580y-cytoskeleton-marker-ab52625.html">https://www.abcam.cn/cytokeratin-19-antibody-ep1580y-cytoskeleton-marker-ab52625.html</a>                                                           |
| Ck19/CK19 Alexa Fluor® 647 for FACS: <a href="https://www.abcam.cn/alexa-fluor-647-cytokeratin-19-antibody-ep1580y-ab192980.html">https://www.abcam.cn/alexa-fluor-647-cytokeratin-19-antibody-ep1580y-ab192980.html</a>                                         |
| Ace2/ACE2 CoraLite®488 Fluorescent Dye for FACS: <a href="https://www.ptgcn.com/products/ACE2-Antibody-CL488-66699.htm">https://www.ptgcn.com/products/ACE2-Antibody-CL488-66699.htm</a>                                                                         |
| IgG2a heavy chain PE/Cy7® for FACS: <a href="https://www.abcam.cn/goat-mouse-igg2a-heavy-chain-pecy7-preadsorbed-ab130787.html">https://www.abcam.cn/goat-mouse-igg2a-heavy-chain-pecy7-preadsorbed-ab130787.html</a>                                            |
| Isotype control to DUOX2 PE/Cy 7 for FACS: <a href="https://www.bdbiosciences.com/zh-cn/search-results?searchKey=557872">https://www.bdbiosciences.com/zh-cn/search-results?searchKey=557872</a>                                                                 |
| Isotype control to CK19 Alexa Fluor® 647 for FACS: <a href="https://www.abcam.cn/alexa-fluor-647-rabbit-igg-monoclonal-epr25a-isotype-control-ab199093.html">https://www.abcam.cn/alexa-fluor-647-rabbit-igg-monoclonal-epr25a-isotype-control-ab199093.html</a> |
| Isotype control to ACE2 CoraLite®488 for FACS: <a href="https://www.ptgcn.com/products/IgG1-Isotype-Control-Antibody-CL488-65124.htm">https://www.ptgcn.com/products/IgG1-Isotype-Control-Antibody-CL488-65124.htm</a>                                           |

## Animals and other organisms

Policy information about [studies involving animals](#); [ARRIVE guidelines](#) recommended for reporting animal research

|                         |                                                                                                                                                                    |
|-------------------------|--------------------------------------------------------------------------------------------------------------------------------------------------------------------|
| Laboratory animals      | Wild type 7-week-old male C57BL/6 J mice were used for FACS and wild type 8- to 12-week-old male C57BL/6 J mice were used for isolating primary mouse hepatocytes. |
| Wild animals            | The study did not involve wild animals.                                                                                                                            |
| Field-collected samples | The study did not involve samples collected from the field.                                                                                                        |

## Ethics oversight

Animal protocols were approved by the Institutional Animal Care and Use Committee of the First Affiliated Hospital of Third Military Medical University (AMUWEC20211648).

Note that full information on the approval of the study protocol must also be provided in the manuscript.

## Human research participants

Policy information about [studies involving human research participants](#)

## Population characteristics

For scRNA-seq and ST analyses, biopsied liver samples were obtained from 5 PBC patients with no history of ursodeoxycholic acid (UDCA) treatment (Supplementary Table 1). These PBC patients were diagnosed by an elevated serum alkaline phosphatase (ALP) levels and positive anti-mitochondrial antibodies (AMAs). Their liver tissues were biopsied to histologically exclude autoimmune hepatitis and other liver diseases (Supplementary Table 2 and Supplementary Fig. 1). Control surgical liver samples were obtained from 4 patients, who had no evidence of PBC, cholestasis, viral hepatitis, and autoimmune hepatitis (Supplementary Table 1). Three surgical liver samples were obtained from control patients for fluorescence-activated cell sorting (FACS) analysis of cholangiocytes (Supplementary Table 8). Moreover, surgical or biopsied liver samples from 16 control patients, 1 nonalcoholic steatohepatitis (NASH), 1 obstructive cholestasis (OC), 1 secondary sclerosing cholangitis (SSC) and 18 PBC patients, and an intestinal sample from 1 control patient were used for multiplex IF, RNAscope and liver histological assessments (Supplementary Table 9). The histological sections were evaluated by an experienced hepatopathologist in a blinded fashion and the degrees of fibrosis, bile duct loss, cholangitis and hepatitis activity in each sample were scored using the Ludwig and Nakanuma systems. Blood samples from 6 healthy volunteers and 10 PBC patients were used for proteomics (Supplementary Table 10). In addition, serum samples from 12 control subjects, 17 PBC patients, and 15 OC patients were used to quantify the levels of serum anti-pIgR antibodies by the ELISA assay (Supplementary Table 12).

## Recruitment

Participants diagnosed at the First Affiliated Hospital of Third Military Medical University and the Xiangya Hospital of Central South University who meet our pre-defined criterion and are volunteer to participate in the study with a written informed consent were recruited. All participants are diagnosed according to international unified standards and have not received any treatment. There is no evidence for a self-selection bias.

## Ethics oversight

The study protocol was approved by the Ethics Committees of the First Affiliated Hospital of Third Military Medical University and the Xiangya Hospital of Central South University. A corresponding written informed consent was obtained from individual subjects.

Note that full information on the approval of the study protocol must also be provided in the manuscript.

## Flow Cytometry

### Plots

Confirm that:

- The axis labels state the marker and fluorochrome used (e.g. CD4-FITC).
- The axis scales are clearly visible. Include numbers along axes only for bottom left plot of group (a 'group' is an analysis of identical markers).
- All plots are contour plots with outliers or pseudocolor plots.
- A numerical value for number of cells or percentage (with statistics) is provided.

### Methodology

## Sample preparation

The tissue pieces were digested in GEXSCOPE® Tissue Dissociation Solution (Singleron, Cat#1020012) at 37°C for 20 minutes with consistent agitation and filtered through 70 µm sterile cell strainer (Falcon, Cat#352340), followed by centrifuged. After lysis of red blood cells, the remaining cells were examined for their viability (a cell preparation with >90% viability was used for subsequent experiments). A similar protocol was used for preparing mouse liver tissue single-cell suspension except for using 40% Percoll buffer (GE Healthcare, Cat#10283278) to wash the cell pellets once before red blood cell (RBC) lysis.

## Instrument

BD FACSCanto II (BD Biosciences)

## Software

FlowJo (version 10.6.2)

## Cell population abundance

Cell population numbers can vary between each cell isolation and between the preparations from the different samples and species. However, this was irrelevant since the sorting was used to enrich for the target cell populations, marked with specific antibodies. The purity of the isolated cells was expressed as percentage of total cholangiocytes in post-sort samples

## Gating strategy

Cells were firstly gated based on forward (FSC-A) and side (SSC-A) scatters to exclude debris. Dead cells were excluded based on their positive staining for DAPI. Next, a lineage marker, Ck19 was to distinguish cholangiocytes from liver cells. Cells from the positive fraction were further examined using anti-ACE2 and anti-DUOX2 antibodies.

- Tick this box to confirm that a figure exemplifying the gating strategy is provided in the Supplementary Information.
